# Supplementary material for: “Schizoid” reactivity of 1,1′-diisocyanoferrocene
Source: Royal Society of Chemistry journal article supplement (doi:10.1039/b709063c), 2007-01-01
Supplement: b709063c.pdf [file b709063c.pdf]

## “Schizoid Reactivity” of 1,1'-Diisocyanoferrocene

Ulrich Siemeling,\* Dag Rother and Clemens Bruhn

*Institute of Chemistry, University of Kassel, D-34109 Kassel, Germany*

### 1. Preparative Work

*General Considerations:* Synthetic work involving air-sensitive compounds was performed under an atmosphere of dry nitrogen by using standard Schlenk techniques or a conventional glovebox. Solvents and reagents were appropriately dried and purified. 1,1'-Diisocyanoferrocene (**1**) was prepared according to the published procedure.<sup>S1</sup>  $[\text{Au}(\text{C}\equiv\text{C}-\text{Fc})]_n$  was prepared from ethynylferrocene and  $[\text{AuCl}(\text{SMe}_2)]$  in analogy to closely related compounds.<sup>S2</sup> NMR spectra were recorded with a Varian Unity INOVA 500 spectrometer operating at 500.13 MHz for  $^1\text{H}$ . IR spectra were recorded with a BIO-RAD FTS-40a spectrometer. Elemental analyses were performed by Mikroanalytisches Laboratorium H. Kolbe (Mülheim an der Ruhr, Germany).

#### *Synthesis of (3)<sub>3</sub>*

A solution of 1,1'-diisocyanoferrocene (**1**) (67 mg, 0.28 mmol) in dichloromethane (15 ml) was added dropwise with stirring to a suspension of  $[\text{Au}(\text{C}\equiv\text{C}-\text{Fc})]_n$  (232 mg, 0.57/*n* mmol) in dichloromethane (15 ml). After 14 h the mixture was filtered to remove a small amount of insoluble material. The filtrate was reduced to dryness *in vacuo*. Yield 216 mg (72 %). The crude product was purified by recrystallisation from dichloromethane.

Anal. Calcd for  $\text{C}_{108}\text{H}_{78}\text{N}_6\text{Au}_6\text{Fe}_9$ : C, 41.26; H, 2.50; N, 2.67. Found C, 40.96; H, 2.57; N, 2.80%.

$^1\text{H}$  NMR ( $\text{CD}_2\text{Cl}_2$ ):  $\delta$  4.04 (“t”, apparent  $J = 1.8$  Hz, 6 H), 4.12 (s, 15 H), 4.26 (s, 15 H), 4.27 (“t”, apparent  $J = 1.8$  Hz, 6 H), 4.40 (“t”, apparent  $J = 2.0$  Hz, 6 H), 4.42 (“t”, apparent  $J = 1.7$  Hz, 6 H), 4.52 (“t”, apparent  $J = 1.7$  Hz, 6 H), 4.56 (“t”, apparent  $J = 1.8$  Hz, 6 H), 5.18 (“t”, apparent  $J = 1.9$  Hz, 6 H), 5.41 ppm (“t”, apparent  $J = 1.9$  Hz, 6 H).

$^{13}\text{C}\{^1\text{H}\}$  NMR ( $\text{CD}_2\text{Cl}_2$ ):  $\delta$  67.9, 68.3, 69.0, 69.5, 70.0, 70.1 (Cp), 70.6 (Cp), 70.8, 71.8, 72.3; the signals of the quaternary C atoms could not be detected with certainty.

IR:  $\nu(\text{N}\equiv\text{C})$  2201,  $\nu(\text{C}\equiv\text{C})$  2155,  $\nu(\text{N}=\text{C})$  1491  $\text{cm}^{-1}$ . This assignment is based on data reported for related compounds: The isocyanide band of **1** and of its gold complex  $[(\mu\text{-1})(\text{AuCl})_2]_\infty$  is located at 2118 and 2226  $\text{cm}^{-1}$ , respectively.<sup>S3</sup> Two  $\nu(\text{C}\equiv\text{C})$  bands are observed for  $[\text{Au}(\text{C}\equiv\text{C}\text{-Fc})]_n$  at 1976 and 2011  $\text{cm}^{-1}$ . One such band at 1973  $\text{cm}^{-1}$  has been reported for the analogous  $[\text{Au}(\text{C}\equiv\text{C}\text{-Ph})]_n$ , which is shifted to 2130  $\text{cm}^{-1}$  in the case of the isocyanide complex  $[\text{Au}(\text{C}\equiv\text{C}\text{-Ph})(\text{CN}t\text{Bu})]$ .<sup>S4</sup> The  $\nu(\text{C}=\text{N})$  band of  $\text{Ph}\text{-C}\equiv\text{C}\text{-C}(=\text{NPh})\text{Ph}$  is located at 1560  $\text{cm}^{-1}$ ,<sup>S5</sup> while it occurs at 1530  $\text{cm}^{-1}$  in the case of the mononuclear iminoacyl complex  $[\text{Pd}\{\text{C}(\text{C}\equiv\text{C}\text{-Ph})(=\text{NPh})\}\text{-Cl}(\text{PEt}_3)_2]$ .<sup>S6</sup> It is well documented for binuclear complexes that a  $\sigma, \mu_2$ -iminoacyl coordination leads to a notable energy decrease of this band of ca. 60  $\text{cm}^{-1}$  with respect to the parent imine.<sup>S7</sup>

## 2. Crystallographic Work

Single crystals of  $(\mathbf{3})_3$  were obtained by slow cooling of a dichloromethane solution to  $-40$  °C. The crystals were small and of poor quality. Diffraction experiments were carried out within a  $\theta$  range of  $25.5^\circ$ ; in the refinement process the  $\theta$  range was limited to  $22.5^\circ$ , which led to a poor data/parameter ratio. To increase this ratio the cyclopentadienyl rings were constrained to regular pentagons. 11 C atoms (attached to the electron-rich metal centres) were included to the model

with isotropic displacement parameters. X-ray structural data are available as a separate file in CIF format. CCDC 641517.

We note that the structurally characterised  $\sigma,\mu_2$ -iminoacyl complexes exhibit C–N bond lengths of ca. 1.30 Å, similar to what we observed for (**3**)<sub>3</sub> (see Figure 1b).<sup>S8</sup>

### References to Supporting Information

- (S1) D. van Leusen and B. Hessen, *Organometallics*, 2001, **20**, 224.
- (S2) G. Hogarth and M. M. Alvarez-Falcón, *Inorg. Chim. Acta*, 2005, **358**, 1386.
- (S3) U. Siemeling, D. Rother, C. Bruhn, H. Fink, T. Weidner, F. Träger, A. Rothenberger, D. Fenske, A. Priebe, J. Maurer and R. Winter, *J. Am. Chem. Soc.*, 2005, **127**, 1102.
- (S4) G. E. Coates and C. Parkin, *J. Chem. Soc.*, 1962, 3220.
- (S5) E.-U. Würthwein and R. Weigmann, *Angew. Chem. Int. Ed. Engl.*, 1987, **26**, 923.
- (S6) K. Onitsuka, H. Ogawa, T. Joh, S. Takahashi, Y. Yamamoto and H. Yamazaki, *J. Chem. Soc. Dalton Trans.*, 1991, 1531.
- (S7) D. Seyferth and J. B. Hoke, *Organometallics*, 1988, **7**, 524.
- (S8) (a) C.-G. Yan, J. Sun and J. Sun, *J. Organomet. Chem.*, 1999, **585**, 63 [1.287(4) Å]; (b) L.-C. Song, G.-L. Lu, Q.-M. Hu, X.-D. Qin, C.-X. Sun, J. Yang and J. Sun, *J. Organomet. Chem.*, 1998, **571**, 55 [1.293(5) Å]; (c) F. H. Antwi-Nsiah, O. Oke and M. Cowie, *Organometallics*, 1996, **15**, 1042 [1.39(2) Å]; (d) A. Klose, E. Solari, C. Floriani, A. Chiesi-Villa, C. Rizzoli and N. Re, *J. Am. Chem. Soc.*, 1994, **116**, 9123 [1.292(6) Å]; (e) K. I. Hardcastle, H. Minassian, A. J. Arce, Y. De Sanctis and A. J. Deeming, *J. Organomet. Chem.*, 1989, **368**, 119 [1.31(3) Å, 1.32(3) Å]; (f) H. Patin, G. Mignani, C. Mahe, J.-Y. Le Marouille, A. Benoit, D. Grandjean and G. Levesque, *J. Organomet. Chem.*, 1981, **208**, C39 [1.265(4) Å]; (g) R. D. Adams and N. M. Golembeski, *Inorg. Chem.*, 1978, **17**, 1969 [1.278(10) Å].
